# Supplementary material for: Food deprivation disrupts normal holistic processing of domain-specific stimuli
Source: Springer Nature journal article supplement (doi:10.1007/s00426-018-1062-z), 2018-07-23
Supplement: MOESM1 [file 15973700]

## Sheet: גיליון2
	Food-deprived
	FOOD												SHAPE
	6.1	6.25	6.4	6.55	6.7	6.85	7.15	7.3	7.45	7.6	7.75	7.9	6.1	6.25	6.4	6.55	6.7	6.85	7.15	7.3	7.45	7.6	7.75	7.9
sub14	0.0625	0.0625	0.3125	0.25	0.6875	0.5625	0.8125	1	1	0.9375	1	1	0.0625	0.125	0.1875	0.375	0.5625	0.6875	1	0.875	1	1	0.875	1
sub15	0.125	0.125	0.1875	0.125	0.5	0.6875	0.8125	0.9375	0.875	1	1	1	0.125	0.1875	0.1875	0.375	0.5	0.75	0.9375	1	1	0.9375	0.9375	1
sub18	0.0625	0	0.1875	0.125	0.375	0.4375	0.8125	0.75	1	0.9375	1	0.875	0.125	0.1875	0.3125	0.25	0.375	0.375	1	0.8125	0.8125	0.875	0.875	0.9375
sub19	0.0625	0	0	0.0625	0.375	0.25	1	0.9375	1	1	1	1	0	0	0	0.25	0.375	0.625	1	1	1	1	1	1
sub20	0.0625	0	0.0625	0.0625	0	0.1875	0.5625	0.9375	0.875	0.9375	0.75	0.875	0.0625	0.0625	0.0625	0.0625	0.25	0.3125	0.5	0.4375	0.4375	0.6875	0.75	0.8125
sub21	0.0625	0.25	0.375	0.1875	0.6875	0.75	0.8125	0.8125	0.875	0.9375	0.9375	0.9375	0.3125	0.375	0.4375	0.4375	0.5625	0.5	0.6875	0.875	0.875	0.875	0.875	0.875
sub22	0	0	0.0625	0.125	0.3125	0.4375	0.8125	0.875	0.8125	1	0.875	0.9375	0	0.0625	0.125	0.1875	0.4375	0.5	0.8125	0.875	0.9375	1	1	1
sub23	0	0	0	0.1875	0.125	0.4375	0.875	0.875	0.9375	1	0.9375	1	0	0	0.0625	0.0625	0.25	0.6875	1	1	1	1	1	1
sub24	0	0	0	0	0	0.25	0.6875	1	0.9375	1	1	1	0	0	0	0	0	0.0625	0.6875	0.8125	0.625	0.875	1	0.9375
sub25	0.0625	0	0.125	0.1875	0.3125	0.5	0.875	0.875	1	1	1	1	0.0625	0.0625	0.125	0.4375	0.5	0.625	0.875	0.875	0.875	1	1	1
sub26	0.0625	0.0625	0	0.3125	0.1875	0.8125	0.6875	0.875	0.8125	0.9375	1	1	0	0.0625	0	0	0.3125	0.6875	0.6875	0.9375	1	1	1	1
sub27	0	0	0	0.125	0.1875	0.375	0.6875	0.9375	0.8125	0.875	1	1	0	0	0	0	0.25	0.375	0.625	0.875	1	0.875	1	1
sub28	0.1875	0	0.25	0.25	0.625	0.5	0.875	0.9375	1	0.9375	1	1	0	0	0	0.1875	0.125	0.3125	0.625	0.8125	0.8125	1	1	0.9375
sub29	0	0.0625	0.125	0.125	0.375	0.3125	0.5	0.625	0.875	0.8125	0.9375	0.9375	0.0625	0.125	0.1875	0.4375	0.3125	0.5625	0.625	0.6875	0.8125	1	0.9375	1
sub31	0.1875	0	0.3125	0.5	0.5	0.6875	0.875	0.875	0.9375	1	1	1	0.0625	0.0625	0.125	0.375	0.875	0.6875	0.8125	1	0.875	0.875	0.875	0.8125
sub32	0	0	0	0.0625	0.0625	0.4375	0.75	0.75	1	1	1	1	0	0	0	0	0.0625	0	0.4375	0.375	0.75	0.8125	0.9375	1
sub34	0	0	0.0625	0.0625	0.0625	0.3125	0.6875	0.6875	0.9375	1	0.9375	1	0	0.25	0.3125	0.3125	0.25	0.375	0.4375	0.5	0.5625	0.625	0.8125	0.625
sub39	0	0	0	0	0.0625	0.375	0.875	0.9375	1	1	1	1	0	0	0	0.0625	0.5	0.625	0.9375	0.9375	0.9375	1	1	1
sub41	0	0	0.0625	0.0625	0.125	0.25	0.25	0.4375	0.5	0.5625	0.8125	0.75	0	0	0	0	0.1875	0.125	0.6875	0.625	0.875	0.875	1	1
sub43	0	0	0	0	0.0625	0.3125	0.75	0.75	0.8125	0.875	1	1	0	0	0	0.1875	0.5	0.625	0.9375	1	0.9375	1	1	1
sub44	0	0	0.0625	0	0	0.1875	0.4375	0.875	0.875	1	1	1	0	0	0	0	0.0625	0.0625	0.5625	0.8125	1	1	0.9375	1
sub45	0	0	0.125	0.1875	0.125	0.375	0.8125	0.8125	0.875	1	0.875	0.9375	0	0.0625	0.125	0.125	0.375	0.375	0.8125	0.8125	1	1	1	1
sub49	0	0	0	0.0625	0.0625	0.3125	0.75	0.875	0.9375	1	1	1	0	0.0625	0	0.0625	0.0625	0.125	0.75	0.625	0.875	0.5625	0.6875	1
sub50	0.125	0.0625	0.0625	0.3125	0.4375	0.6875	0.9375	0.9375	0.9375	0.9375	1	1	0.1875	0.75	0.625	0.75	0.8125	1	1	1	1	1	1	1
sub60	0	0	0.0625	0.0625	0	0	0.375	0.5625	0.625	0.6875	0.75	0.875	0	0.0625	0.1875	0	0.0625	0.0625	0.3125	0.375	0.5	0.75	0.875	0.875
sub61	0.0625	0.0625	0.125	0.0625	0.1875	0.125	0.25	0.125	0.3125	0.4375	0.6875	0.5625	0.0625	0.0625	0.0625	0.3125	0.4375	0.5	0.8125	0.875	0.875	0.9375	1	1
sub62	0	0	0.0625	0	0.0625	0.1875	0.375	0.625	0.875	1	1	0.9375	0	0	0.0625	0.0625	0	0.0625	0.3125	0.625	0.875	0.9375	0.875	0.9375
sub63	0.0625	0.25	0.1875	0.375	0.3125	0.6875	0.75	1	0.875	0.9375	1	1	0.0625	0.0625	0.125	0.25	0.3125	0.75	0.9375	1	0.9375	1	1	1
sub64	0	0.125	0	0.0625	0.3125	0.375	0.875	0.5625	0.75	0.75	0.625	0.5625	0.125	0.3125	0.1875	0.375	0.4375	0.5625	0.875	0.9375	0.8125	0.875	0.75	1
sub65	0.0625	0.25	0.1875	0.3125	0.25	0.375	0.5	0.625	0.6875	0.8125	0.875	0.8125	0.125	0.125	0.125	0.25	0.5	0.25	0.625	0.6875	0.625	0.875	0.9375	0.5625
sub66	0.0625	0.0625	0.0625	0.25	0.125	0.1875	0.5	0.5625	0.4375	0.8125	0.75	0.9375	0.125	0.0625	0.3125	0.6875	0.5625	0.5	0.875	1	0.9375	0.875	0.9375	0.9375
sub67	0.0625	0.125	0.1875	0.3125	0.5	0.6875	0.75	1	0.9375	1	1	1	0.125	0	0.0625	0.375	0.4375	0.25	0.8125	0.9375	1	1	1	1
sub68	0	0.0625	0.125	0.3125	0.3125	0.3125	0.8125	0.875	0.9375	1	1	0.9375	0	0.0625	0.25	0.1875	0.625	0.625	0.8125	1	0.875	1	1	0.875
sub71	0.0625	0.1875	0.25	0.4375	0.6875	0.8125	0.8125	1	0.9375	1	0.9375	1	0.0625	0.0625	0.1875	0.25	0.4375	0.8125	0.875	0.9375	0.9375	1	0.9375	1
sub74	0.0625	0	0.0625	0.25	0.125	0.5625	0.6875	0.75	0.9375	1	1	1	0	0	0	0.0625	0.25	0.5625	0.8125	0.875	1	1	1	1
sub75	0	0	0.125	0.125	0.25	0.3125	0.5625	0.625	0.8125	0.6875	0.8125	0.875	0.25	0.25	0.3125	0.25	0.5	0.625	0.5625	0.75	0.8125	0.6875	0.9375	0.8125
sub76	0	0	0	0	0.3125	0.3125	0.4375	0.9375	0.875	1	1	1	0	0	0	0	0.125	0.375	0.8125	1	0.9375	1	1	1
sub77	0	0.0625	0.125	0.125	0.1875	0.125	0.5	0.875	0.6875	0.875	0.9375	0.875	0.0625	0.1875	0.125	0.125	0.1875	0.3125	0.625	0.4375	0.5	0.625	0.75	0.8125
sub78	0.0625	0	0.125	0.25	0.5	0.5625	1	0.9375	0.875	0.9375	1	1	0	0	0	0.25	0.375	0.8125	1	0.875	1	1	1	1
sub79	0	0.0625	0.0625	0.25	0.0625	0.375	0.5625	0.875	1	1	1	1	0.0625	0.0625	0.1875	0.25	0.25	0.3125	0.5625	0.75	0.9375	0.8125	0.9375	1
sub80	0.0625	0	0.25	0.5	0.4375	0.875	0.8125	1	1	1	1	1	0.0625	0.25	0.25	0.25	0.6875	0.75	0.9375	1	1	1	1	1
sub81	0	0	0	0.0625	0.1875	0.75	0.8125	0.875	0.9375	0.9375	1	1	0.0625	0	0.0625	0.375	0.375	0.6875	0.875	1	1	1	0.9375	1
sub83	0	0.0625	0	0.25	0.125	0.125	0.375	0.875	0.5625	0.8125	0.875	0.9375	0	0.0625	0.1875	0.125	0.25	0.4375	0.875	0.9375	0.9375	1	1	1
sub84	0	0.0625	0	0	0	0.125	0.5625	0.875	0.875	0.75	0.9375	0.875	0	0	0	0.0625	0.125	0.25	0.5625	0.5625	0.5625	0.8125	0.875	0.6875
sub86	0	0.0625	0.0625	0.1875	0.25	0.375	0.5	0.75	0.625	0.875	0.75	0.75	0	0.1875	0.0625	0.25	0	0.25	0.6875	0.375	0.5625	0.75	0.8125	0.875
averages	0.0361111	0.0458333	0.0986111	0.168056	0.254167	0.415278	0.683333	0.813889	0.848611	0.911111	0.933333	0.9375	0.05	0.0944444	0.125	0.215278	0.343056	0.4625	0.755556	0.811111	0.858333	0.906944	0.934722	0.940278
Non-deprived
	FOOD												SHAPE
	6.1	6.25	6.4	6.55	6.7	6.85	7.15	7.3	7.45	7.6	7.75	7.9	6.1	6.25	6.4	6.55	6.7	6.85	7.15	7.3	7.45	7.6	7.75	7.9
sub1	0.125	0.25	0.1875	0.125	0.4375	0.625	0.9375	1	0.9375	1	1	1	0	0.125	0.4375	0.4375	0.6875	0.8125	1	1	1	1	0.9375	1
sub2	0	0.0625	0.25	0.4375	0.4375	0.5625	0.875	0.9375	0.9375	0.9375	0.9375	0.9375	0.125	0.0625	0.0625	0.4375	0.5625	0.5625	1	0.875	1	1	1	1
sub3	0	0	0	0	0.0625	0.25	0.375	0.75	0.6875	0.9375	0.875	0.9375	0	0	0	0.0625	0.0625	0.125	0.6875	0.75	1	1	1	1
sub4	0	0	0	0	0.0625	0.25	0.375	0.75	0.6875	0.9375	0.875	0.9375	0	0	0	0.0625	0.0625	0.125	0.6875	0.75	1	1	1	1
sub5	0.0625	0.1875	0.25	0.375	0.4375	0.625	0.9375	0.9375	1	1	1	1	0.0625	0	0.3125	0.375	0.5	0.6875	1	1	0.9375	1	1	1
sub6	0	0.0625	0.125	0.1875	0.3125	0.4375	0.9375	0.9375	0.9375	1	1	1	0	0.125	0.1875	0.375	0.5	0.75	0.9375	0.75	0.9375	0.8125	1	1
sub7	0.0625	0.3125	0.3125	0.5625	0.625	0.9375	1	0.9375	0.9375	1	1	1	0.1875	0	0.375	0.375	0.75	0.9375	0.9375	1	0.9375	1	1	1
sub8	0	0	0.0625	0.125	0.5625	0.5625	0.875	1	1	1	1	1	0.0625	0	0	0	0.125	0.5625	0.875	1	1	1	1	1
sub10	0.0625	0.125	0.3125	0.5625	0.5	0.5	0.8125	0.9375	1	1	1	1	0	0.125	0.25	0.1875	0.5625	0.6875	0.75	0.9375	0.9375	1	0.9375	0.9375
sub12	0.125	0	0.1875	0.375	0.5625	0.875	1	1	1	0.9375	1	1	0	0	0.125	0.3125	0.5	0.5	0.8125	1	1	1	1	1
sub13	0.0625	0	0	0.0625	0.5	0.3125	0.6875	0.8125	0.9375	0.875	1	1	0	0	0.0625	0.125	0.1875	0.4375	0.625	0.8125	0.875	0.875	0.9375	0.875
sub33	0	0	0	0.1875	0.1875	0.5	1	1	1	1	1	1	0	0	0.0625	0.125	0.0625	0.1875	0.6875	0.875	1	1	0.9375	1
sub35	0	0.0625	0.0625	0.1875	0.25	0.625	0.875	1	0.875	1	1	1	0.3125	0.3125	0.3125	0.125	0.4375	0.8125	1	0.875	0.9375	0.9375	1	0.9375
sub36	0.25	0.5	0.6875	0.5625	0.5	0.875	0.875	0.875	1	0.9375	0.875	1	0.125	0.0625	0.1875	0.5625	0.5	0.8125	0.9375	0.9375	1	1	1	1
sub38	0	0	0.125	0.1875	0.1875	0.3125	0.625	0.6875	0.75	0.875	0.9375	1	0.0625	0.1875	0.0625	0.1875	0.3125	0.1875	0.375	0.625	0.5625	0.8125	0.6875	0.8125
sub40	0.125	0.1875	0.375	0.5	0.4375	0.625	1	0.9375	0.75	1	0.9375	1	0.1875	0	0.25	0.3125	0.25	0.3125	0.6875	0.875	0.625	0.9375	1	0.8125
sub46	0	0.125	0.0625	0.125	0.1875	0.375	0.8125	0.9375	0.9375	1	1	0.9375	0	0.0625	0	0.0625	0.3125	0.3125	0.875	1	1	1	1	1
sub47	0.125	0.125	0.3125	0.3125	0.5625	0.8125	0.6875	1	0.875	1	0.9375	1	0	0.1875	0.25	0.375	0.5625	0.625	0.9375	0.875	1	0.9375	1	1
sub48	0	0	0.125	0.1875	0.0625	0.5625	0.9375	0.9375	1	1	1	1	0	0	0.0625	0.3125	0.375	0.4375	0.9375	0.875	1	1	1	1
sub51	0	0	0	0.125	0	0.125	0.625	0.6875	0.75	1	1	1	0.125	0	0	0	0.0625	0.0625	0.4375	0.75	0.5	0.5625	0.75	0.625
sub52	0.0625	0.3125	0.625	0.375	0.6875	0.9375	1	0.9375	1	1	1	1	0.125	0.125	0.3125	0.4375	0.8125	0.875	1	1	1	1	1	1
sub53	0.125	0	0.0625	0.0625	0.125	0.25	0.5	0.75	0.9375	0.875	0.75	1	0.0625	0	0.125	0.3125	0.3125	0.75	0.8125	1	0.875	0.9375	1	0.9375
sub54	0	0	0	0.0625	0.1875	0.1875	0.25	0.6875	0.6875	0.8125	0.8125	0.875	0	0.125	0.25	0.125	0.125	0.1875	0.4375	0.5	0.6875	0.8125	0.9375	0.6875
sub55	0	0.125	0.1875	0.625	0.625	0.875	1	1	1	1	1	1	0.125	0.0625	0.0625	0.5	0.5	0.875	0.875	0.9375	1	1	1	1
sub56	0.0625	0.25	0.5	0.4375	0.5	0.375	0.8125	0.875	0.9375	0.8125	0.9375	0.875	0.1875	0.375	0.25	0.25	0.5	0.4375	0.6875	0.5625	0.875	0.9375	0.8125	0.875
sub57	0.125	0.1875	0.25	0.625	0.4375	0.75	1	0.9375	0.9375	1	1	1	0.125	0.125	0.1875	0.25	0.5	0.8125	1	1	1	0.9375	0.9375	0.9375
sub58	0.0625	0	0.0625	0	0.1875	0.625	0.875	1	1	1	1	1	0	0.1875	0	0.3125	0.75	0.9375	0.9375	1	1	0.9375	0.9375	1
sub59	0	0	0	0.125	0.25	0.3125	0.875	0.9375	0.9375	0.9375	0.9375	1	0	0	0.1875	0.0625	0.5	0.75	1	1	1	1	1	1
sub69	0	0	0	0.0625	0.125	0.3125	0.75	1	1	0.9375	1	1	0	0	0	0	0.375	0.625	1	1	1	1	1	1
sub70	0	0	0	0.1875	0.25	0.3125	0.875	0.875	0.875	0.9375	0.9375	0.9375	0.0625	0	0.125	0	0.125	0.6875	0.8125	0.6875	0.6875	0.875	1	0.9375
sub72	0.0625	0	0	0.3125	0.4375	0.5625	0.9375	0.875	0.9375	1	1	1	0.125	0.125	0.25	0.375	0.5	0.4375	0.75	0.6875	0.9375	0.875	1	0.9375
sub82	0	0.0625	0.0625	0.375	0.3125	0.375	0.8125	0.8125	0.9375	0.9375	0.875	1	0	0.1875	0.125	0.0625	0.3125	0.1875	0.625	0.75	0.9375	0.9375	1	1
sub87	0	0	0	0.125	0.125	0.5	0.8125	0.9375	0.75	1	1	1	0	0	0.0625	0.0625	0.375	0.5	0.75	0.875	0.875	0.9375	1	1
sub88	0	0.125	0.0625	0.0625	0.25	0.5625	0.875	0.9375	1	1	1	1	0	0	0	0.125	0.25	0.625	0.9375	1	1	1	1	1
sub90	0.1875	0.1875	0.25	0.25	0.5625	0.5625	0.8125	0.8125	1	0.875	0.9375	1	0	0.0625	0	0.375	0.5	0.4375	0.6875	0.875	1	0.75	1	1
sub91	0.1875	0.1875	0.25	0.4375	0.5625	0.9375	0.9375	0.8125	1	1	0.9375	1	0	0.125	0.5	0.625	0.8125	0.75	1	1	1	1	1	1
sub92	0	0.125	0	0.125	0.125	0.1875	0.625	0.75	0.75	0.8125	0.9375	1	0	0.125	0	0.125	0.25	0.25	0.875	0.8125	1	1	1	1
sub93	0	0	0	0	0.125	0.1875	0.6875	0.9375	0.9375	0.9375	0.9375	1	0	0	0	0.0625	0.125	0.0625	0.4375	0.8125	0.9375	1	1	1
sub94	0.4375	0.4375	0.375	0.5625	0.5625	0.375	0.875	0.75	0.9375	0.75	0.875	0.8125	0.1875	0.1875	0.1875	0.125	0.375	0.1875	0.8125	0.875	0.6875	1	0.8125	0.9375
sub95	0	0	0	0.125	0.25	0.5625	0.6875	0.875	0.875	1	0.9375	1	0	0.125	0.1875	0.125	0.25	0.1875	0.8125	0.6875	0.875	0.9375	0.8125	1
sub96	0	0	0	0	0	0.0625	0.5625	0.8125	0.75	0.75	0.9375	0.875	0	0	0	0	0.125	0.375	0.875	0.9375	0.9375	1	1	0.9375
averages	0.0564024	0.097561	0.14939	0.246951	0.330793	0.501524	0.800305	0.887195	0.907012	0.946646	0.954268	0.978659	0.054878	0.0777439	0.141768	0.222561	0.384146	0.509146	0.8125	0.867378	0.916159	0.945122	0.96189	0.955793
