# Supplementary material for: Food deprivation disrupts normal holistic processing of domain-specific stimuli
Source: Springer Nature journal article supplement (doi:10.1007/s00426-018-1062-z), 2018-07-23
Supplement: MOESM3 [file 15973700]

## Sheet: גיליון1
	Food-deprived																								Non-deprived
	FOOD												SHAPE												FOOD												SHAPE
	6.1	6.25	6.4	6.55	6.7	6.85	7.15	7.3	7.45	7.6	7.75	7.9	6.1	6.25	6.4	6.55	6.7	6.85	7.15	7.3	7.45	7.6	7.75	7.9	6.1	6.25	6.4	6.55	6.7	6.85	7.15	7.3	7.45	7.6	7.75	7.9	6.1	6.25	6.4	6.55	6.7	6.85	7.15	7.3	7.45	7.6	7.75	7.9
sub1	0	0	0.0625	0.125	0.3125	0.375	0.75	0.75	0.875	0.9375	1	1	0	0	0.0625	0.25	0.375	0.375	0.875	0.75	1	1	0.9375	0.9375	0	0.0625	0.0625	0	0.0625	0.25	0.75	1	1	1	1	1	0	0	0	0	0	0.1875	0.75	0.9375	0.9375	1	1	1
sub2	0	0.1875	0.25	0.125	0.1875	0.375	0.4375	0.75	0.8125	0.9375	1	0.9375	0	0.0625	0.125	0.1875	0.25	0.4375	0.75	0.8125	0.8125	0.9375	1	0.9375	0	0	0	0.125	0.3125	0.5	0.9375	1	1	1	1	1	0.0625	0	0.1875	0	0.25	0.25	0.875	0.875	0.9375	0.9375	0.8125	0.875
sub3	0	0.0625	0.1875	0.375	0.625	0.8125	0.9375	1	1	1	1	0.9375	0	0.25	0.375	0.625	0.6875	0.9375	1	1	1	1	1	1	0.0625	0.125	0.125	0.1875	0.25	0.625	0.9375	0.9375	1	1	1	0.9375	0	0	0.125	0.1875	0.5625	0.875	1	0.9375	1	1	1	1
sub4	0	0	0	0	0	0	0.375	0.375	0.6875	0.8125	0.5	0.875	0	0	0	0	0	0.0625	0.25	0.25	0.4375	0.6875	0.75	1	0	0	0	0	0.125	0.25	0.4375	0.625	0.8125	0.875	0.9375	1	0.125	0	0	0.0625	0.125	0.125	0.3125	0.375	0.6875	0.5	0.4375	0.75
sub5	0	0	0	0.125	0.1875	0.4375	0.6875	0.9375	1	1	1	0.875	0	0.0625	0.4375	0.6875	0.875	0.9375	0.875	0.875	1	1	1	1	0.0625	0.125	0.1875	0.6875	0.6875	0.9375	1	1	1	1	1	1	0.0625	0.125	0.3125	0.5625	0.6875	1	1	1	1	1	1	1
sub6	0	0	0	0.0625	0.1875	0.25	0.5625	0.625	0.8125	0.75	0.875	0.9375	0	0.125	0.0625	0.25	0.4375	0.4375	0.5	0.875	0.75	0.5	0.875	0.75	0	0.0625	0.0625	0.0625	0.0625	0.0625	0.6875	0.5	0.5	0.875	0.75	0.75	0	0	0.0625	0.0625	0.125	0.1875	0.6875	0.6875	0.75	0.9375	1	0.75
sub7	0	0.0625	0	0.0625	0	0.1875	0.8125	0.875	1	0.875	1	1	0.0625	0.0625	0	0.0625	0.0625	0.125	0.5	0.625	0.875	1	0.9375	1	0	0	0	0	0	0.0625	0.4375	0.8125	0.875	0.875	1	1	0	0	0	0	0	0.1875	0.4375	0.6875	0.8125	0.875	1	1
sub8	0	0.0625	0	0.0625	0.3125	0.1875	0.375	0.5	0.75	0.875	1	1	0	0.0625	0	0	0.1875	0.25	0.875	0.875	0.8125	0.9375	0.9375	1	0	0	0	0.0625	0.0625	0	0.375	0.5	0.8125	0.875	1	1	0.0625	0.0625	0	0.0625	0.0625	0.125	0.4375	0.6875	0.9375	1	1	0.875
sub9	0	0.125	0.4375	0.5625	0.9375	0.9375	1	0.9375	1	1	1	1	0.125	0.4375	0.5625	0.6875	0.875	0.875	0.8125	0.875	1	1	1	1	0.25	0.0625	0.75	0.5625	0.875	0.875	1	1	1	1	1	1	0	0.0625	0.3125	0.375	0.5625	0.75	0.875	1	0.9375	0.9375	1	1
sub10	0	0	0	0.0625	0	0.3125	0.5625	0.875	0.875	0.9375	0.9375	0.9375	0	0	0	0.0625	0.0625	0.5625	0.8125	0.9375	0.875	0.9375	0.9375	1	0	0	0	0	0	0.5	0.75	0.9375	1	1	0.9375	1	0	0	0	0	0.125	0.3125	0.75	0.875	0.9375	0.8125	0.9375	1
sub11	0.0625	0.125	0.4375	0.75	0.75	0.8125	1	1	0.9375	1	1	1	0.0625	0.125	0.25	0.5625	0.6875	0.75	1	1	0.9375	1	1	1	0.1875	0.25	0.5625	0.5625	0.6875	0.75	1	1	1	1	1	1	0.0625	0.0625	0.1875	0.4375	0.6875	0.875	1	1	1	1	1	1
sub12	0	0.0625	0.1875	0.3125	0.4375	0.3125	0.875	1	0.9375	1	0.9375	1	0.0625	0	0.1875	0.25	0.5	0.4375	0.875	1	0.875	0.9375	1	0.9375	0	0	0	0.25	0.1875	0.375	0.8125	0.8125	0.9375	1	0.875	1	0	0.0625	0.0625	0.1875	0.3125	0.625	0.875	0.9375	1	0.875	0.9375	0.9375
sub13	0.0625	0	0	0.0625	0.1875	0.375	0.6875	0.5	0.875	0.8125	1	0.9375	0.0625	0	0.1875	0.5	0.4375	0.625	1	0.9375	0.9375	1	1	1	0.125	0.1875	0.4375	0.625	0.8125	0.8125	1	1	1	0.9375	1	1	0.125	0.0625	0.875	0.9375	0.9375	0.9375	1	1	1	1	1	1
sub14	0	0	0.0625	0.1875	0.375	0.5625	0.625	0.8125	0.8125	0.8125	1	0.8125	0	0	0.125	0.1875	0.1875	0.3125	0.3125	0.75	0.75	0.875	0.9375	0.8125	0.1875	0.125	0.0625	0.3125	0.5625	0.6875	0.8125	0.5625	0.875	0.75	0.75	0.9375	0.0625	0.125	0.0625	0.25	0.125	0.1875	0.5625	0.625	0.9375	0.8125	0.8125	0.8125
sub15	0.0625	0.0625	0.0625	0	0.1875	0.375	0.625	0.8125	0.875	0.9375	1	1	0	0	0.0625	0.125	0.1875	0.3125	0.8125	0.9375	0.9375	0.9375	1	1	0	0	0	0.125	0.0625	0.125	0.5625	0.6875	0.9375	0.9375	1	1	0	0	0	0.0625	0.5	0.5625	0.9375	1	1	1	1	1
sub16	0.0625	0	0	0	0.1875	0.0625	0.375	0.5625	0.9375	0.875	0.875	1	0.0625	0	0	0	0	0.125	0.5	0.5	0.625	0.875	0.9375	0.875	0.0625	0	0.25	0.25	0.375	0.625	0.5625	1	0.9375	0.875	1	1	0.125	0.0625	0.125	0.1875	0.0625	0.25	0.4375	0.625	0.5	0.875	0.8125	0.75
sub17	0	0.0625	0	0	0.1875	0.125	0.5	0.5625	0.875	0.8125	0.8125	1	0	0	0	0	0.125	0.0625	0.5	0.8125	0.9375	0.9375	1	1	0	0	0.0625	0	0.125	0.3125	0.5625	0.4375	0.5	0.8125	0.9375	0.9375	0.0625	0	0	0.0625	0.0625	0.375	0.6875	0.625	1	0.9375	1	0.9375
sub18	0	0	0.0625	0.0625	0.0625	0.1875	0.75	1	1	1	1	1	0	0.0625	0	0	0.25	0.3125	0.5625	0.9375	1	1	1	1	0	0.0625	0.0625	0	0.0625	0.3125	0.875	1	1	1	1	1	0	0	0	0	0.125	0.25	0.8125	1	1	1	1	1
sub19	0	0	0.25	0.4375	0.5	0.8125	1	1	1	1	1	1	0	0	0.1875	0.5	0.6875	0.75	1	1	1	0.9375	1	1	0.0625	0	0.0625	0.1875	0.5625	0.75	1	1	1	1	1	1	0.0625	0.0625	0.125	0.125	0.3125	0.6875	0.9375	1	1	1	1	1
sub20	0	0	0	0.0625	0.125	0.125	0.625	0.9375	1	1	1	1	0.0625	0	0	0	0	0.3125	0.875	0.875	1	0.8125	1	1	0	0	0	0	0.0625	0.3125	0.8125	0.8125	0.875	1	1	1	0	0	0	0	0.125	0.1875	0.5625	0.75	0.875	0.8125	1	1
sub21	0	0	0	0	0.1875	0.375	0.75	0.9375	0.9375	1	1	0.9375	0	0	0	0	0.0625	0.1875	0.8125	1	1	1	1	1	0	0	0	0.0625	0.0625	0.25	0.875	0.8125	0.875	1	1	1	0	0.125	0.125	0.125	0.125	0.1875	0.5625	0.6875	0.9375	1	0.9375	0.9375
sub22	0	0.125	0.125	0.0625	0.25	0.625	0.75	0.8125	0.9375	0.875	0.9375	0.9375	0	0	0.0625	0.0625	0.25	0.3125	0.6875	0.5	0.6875	0.8125	1	0.875	0	0.0625	0.3125	0.5	0.875	0.8125	0.8125	1	1	1	1	1	0.0625	0.1875	0.625	0.75	1	1	1	1	1	1	1	1
sub23	0	0	0.0625	0.1875	0.125	0.5	0.9375	1	1	0.9375	1	0.9375	0	0	0.0625	0.1875	0.4375	0.875	0.9375	0.875	0.9375	0.9375	1	1	0	0	0.0625	0.125	0.5	0.75	1	1	1	1	1	1	0	0	0	0.1875	0.125	0.8125	0.9375	0.9375	1	1	1	1
sub24	0.125	0.0625	0	0.1875	0.3125	0.25	0.5	0.375	0.625	0.8125	0.75	0.6875	0.1875	0.125	0.125	0.25	0.5	0.5	0.75	0.875	0.875	0.6875	1	0.9375	0.0625	0.125	0.125	0.125	0.3125	0.4375	0.625	0.8125	0.375	0.75	0.9375	0.8125	0.0625	0.1875	0.125	0.25	0.375	0.625	0.5	0.6875	0.75	0.875	0.9375	0.8125
sub25	0	0	0	0.0625	0.125	0.0625	0.5	0.875	0.9375	0.9375	1	0.9375	0	0	0.0625	0.0625	0	0.0625	0.625	0.5	0.6875	0.9375	0.875	1	0	0	0.0625	0.125	0	0.25	0.625	0.4375	0.6875	0.875	0.75	0.9375	0	0.0625	0	0.125	0.0625	0.3125	0.625	0.75	0.9375	1	0.9375	1
sub26	0	0	0	0	0.0625	0.1875	0.5625	0.875	0.875	0.9375	1	1	0	0	0	0	0.0625	0	0.625	0.875	1	1	1	1	0	0	0.0625	0	0.0625	0.125	0.625	0.5625	1	1	1	1	0	0	0	0	0.0625	0.0625	0.5	0.8125	0.875	1	1	1
sub27	0	0	0.125	0.0625	0.1875	0.625	0.875	0.9375	1	1	1	1	0	0	0.0625	0.0625	0.4375	0.6875	0.8125	1	1	1	1	1	0	0.0625	0.0625	0.5	0.6875	0.875	1	1	1	1	1	1	0	0.125	0	0.3125	0.4375	0.875	0.9375	1	1	1	1	1
sub28	0	0	0	0.0625	0.1875	0.6875	0.75	0.9375	1	1	1	1	0	0	0	0.0625	0.3125	0.375	0.375	0.6875	0.8125	0.8125	1	1	0	0.0625	0.0625	0.25	0.3125	0.6875	0.75	0.9375	0.9375	1	1	1	0	0	0.0625	0	0.1875	0.25	1	1	0.9375	1	1	1
sub29	0.25	0.1875	0.125	0.375	0.5	0.6875	0.625	0.8125	0.8125	0.8125	0.8125	0.9375	0.1875	0.25	0.25	0.375	0.5	0.5625	0.9375	0.9375	1	1	1	1	0.25	0.1875	0.25	0.3125	0.5	0.5	0.75	0.75	0.875	0.75	0.8125	0.6875	0.0625	0.25	0.125	0.5625	0.25	0.6875	0.9375	0.875	0.9375	0.9375	1	1
sub30	0	0	0	0.125	0.125	0.6875	0.6875	0.9375	0.9375	1	0.9375	1	0	0	0.0625	0.125	0.3125	0.375	0.625	0.8125	0.9375	1	0.8125	1	0	0.0625	0	0.0625	0.25	0.5	0.875	0.9375	0.875	1	1	0.9375	0.0625	0	0.0625	0.125	0.3125	0.4375	0.8125	0.8125	0.9375	0.8125	1	0.9375
sub31	0	0	0	0	0	0.0625	0.4375	0.75	0.6875	0.875	0.9375	1	0	0	0.125	0	0.25	0.3125	0.75	0.875	0.9375	1	1	0.875	0.0625	0	0.0625	0	0.3125	0.25	0.6875	0.9375	1	0.8125	1	0.9375	0	0	0	0	0.125	0.25	0.5625	0.6875	0.8125	0.9375	1	0.9375
sub32	0	0	0.0625	0.125	0.5625	0.75	0.9375	1	1	1	1	1	0	0	0.0625	0.1875	0.5625	0.875	1	1	1	1	1	1	0	0.125	0.1875	0.25	0.5625	0.875	1	0.9375	1	1	1	1	0	0.0625	0	0.25	0.4375	0.8125	1	1	1	1	1	1
sub33	0	0	0	0	0.1875	0.125	0.5	0.875	0.9375	1	1	1	0	0	0	0	0	0	0.375	0.8125	0.875	1	1	1	0	0	0	0	0	0.125	0.5625	0.75	0.9375	0.9375	1	0.9375	0	0	0.0625	0	0.25	0.25	0.5	0.75	0.8125	0.6875	0.9375	0.9375
sub34	0.0625	0.25	0.1875	0.375	0.625	0.5625	0.9375	0.875	0.9375	1	1	1	0.1875	0.4375	0.5	0.5	0.625	0.8125	0.9375	0.9375	1	1	1	1	0.3125	0.25	0.5625	0.375	0.8125	0.625	0.8125	1	1	1	1	1	0.125	0.0625	0.375	0.5625	0.375	0.875	1	1	0.9375	1	1	1
sub35	0	0	0.125	0	0.125	0.375	0.6875	0.75	0.875	0.875	0.9375	0.9375	0	0	0.0625	0.1875	0.3125	0.25	0.75	1	0.9375	0.9375	1	1	0.0625	0	0.0625	0.375	0.3125	0.5	0.6875	0.8125	0.75	0.8125	0.875	1	0.0625	0.25	0.25	0.4375	0.5	0.6875	0.875	0.8125	0.9375	0.75	0.875	1
sub36	0	0	0	0	0	0.0625	0.5	0.9375	1	1	1	1	0.0625	0.0625	0	0.1875	0.125	0.1875	0.9375	0.9375	1	1	1	1	0	0	0	0	0	0.3125	0.625	0.9375	0.9375	1	1	1	0	0	0	0.0625	0.1875	0.1875	0.75	0.9375	1	1	1	1
sub37	0.125	0.125	0.4375	0.625	0.875	0.9375	1	1	1	1	1	1	0	0.25	0.625	0.875	1	1	1	1	1	1	1	1	0.125	0.25	0.3125	0.5	0.75	0.875	1	0.9375	1	1	1	1	0.125	0.3125	0.625	0.8125	0.9375	0.875	1	1	1	1	1	1
sub38	0.0625	0.125	0	0.0625	0.3125	0.25	0.375	0.5625	0.8125	0.875	1	1	0	0.0625	0.1875	0	0.25	0.25	0.875	0.8125	0.8125	0.75	0.875	1	0	0	0	0.0625	0.1875	0.3125	0.8125	1	1	1	1	1	0	0	0.0625	0	0.1875	0.25	0.5625	0.875	0.8125	0.875	0.9375	1
sub39	0.125	0	0	0.125	0.375	0.4375	0.75	0.8125	0.9375	0.9375	1	1	0	0	0	0	0.0625	0.3125	0.625	0.9375	0.8125	0.9375	1	0.875	0	0	0	0.0625	0.125	0.4375	0.75	1	0.9375	1	0.9375	0.9375	0	0	0	0	0.0625	0.25	0.5625	0.9375	0.9375	0.9375	1	1
sub40	0	0	0	0	0.125	0.3125	0.8125	0.5625	0.9375	0.875	0.8125	1	0.0625	0	0.0625	0.125	0.3125	0.375	0.6875	0.8125	0.9375	0.9375	0.9375	1	0.125	0	0.1875	0.0625	0.25	0.25	0.625	0.375	0.75	0.6875	0.875	1	0.1875	0.1875	0.0625	0.0625	0.1875	0.25	0.375	0.4375	0.5625	0.4375	0.4375	0.6875
averages	0.025	0.0421875	0.08125	0.146875	0.275	0.404687	0.685937	0.810937	0.90625	0.928125	0.951562	0.964063	0.0296875	0.0609375	0.123438	0.204687	0.33125	0.432812	0.745313	0.845313	0.895312	0.926562	0.96875	0.970313	0.05	0.05625	0.126562	0.19375	0.320312	0.471875	0.770312	0.839063	0.9	0.935937	0.959375	0.96875	0.0390625	0.0625	0.125	0.204687	0.298438	0.471875	0.748437	0.840625	0.909375	0.914062	0.94375	0.948438
